# Supplementary material for: 3-Nitro-4-(tetrazol-5-yl) furazan: theoretical calculations, synthesis and performance
Source: Royal Society of Chemistry journal article supplement (doi:10.1039/c8ra02682c), 2018-01-01
Supplement: c8ra02682c1.pdf [file c8ra02682c1.pdf]

**Supplementary material for: 3-nitro-4-(tetrazol-5-yl) furazan: Theoretical calculation, Synthesis and Performance**

Zhiyue Han<sup>1\*</sup>, Qi Jiang, Zhiming Du, Yupeng Zhang, Yuezhen Yang

State Key Laboratory of Explosion Science and Technology, Beijing Institute of Technology, 5

South Zhongguancun Street, Haidian District, Beijing, 100081, China

The structure of NTZF was optimized with B3LYP / 6-311 ++ G \*\*<sup>[13]</sup> using the Gaussian 09 software package. The geometric structure, bond lengths and bond angles of the NTZF molecule are shown in supplementary Table 1 and Table 2.

**Supplementary Table 1** Bond length of NTZF

| parameter | Bond lengths / Å | parameter | bond lengths / Å |
|-----------|------------------|-----------|------------------|
| O1—N5     | 1.36             | N7—N9     | 1.32             |
| O1—N6     | 1.37             | N7—C11    | 1.33             |
| C2—N6     | 1.31             | N8—N10    | 1.30             |
| C3—N5     | 1.30             | N8—C11    | 1.36             |
| C2—C3     | 1.43             | N9—N10    | 1.33             |
| C2—C11    | 1.46             | N12—O13   | 1.22             |
| C3—N12    | 1.47             | N12—O14   | 1.21             |
| H4—N9     | 1.01             |           |                  |

**Supplementary Table 2** Bond angles of NTZF

| bond      | bond angles / ° | bond       | bond angles / ° |
|-----------|-----------------|------------|-----------------|
| N5—O1—N6  | 112.03          | N9—N7—C11  | 100.85          |
| C3—C2—N6  | 107.02          | N10—N8—C11 | 106.04          |
| C3—C2—C11 | 130.05          | N8—N10—N9  | 105.88          |
| C2—C3—N5  | 110.36          | N7—N9—N10  | 114.62          |
| C2—C3—N12 | 129.07          | C2—C11—N7  | 122.77          |
| O1—N5—C3  | 104.64          | N7—C11—N8  | 112.60          |
| O1—N6—C2  | 105.94          | C3—N12—O13 | 115.27          |

\* Corresponding author. Tel.: +86-01-68912765. Fax: +86-01-68912765

e-mail: [hanzhiyue@bit.edu.cn](mailto:hanzhiyue@bit.edu.cn) (Zhiyue Han)

---

H4—N9—N7

122.90

O13—N12—O14

117.41

---
